# Supplementary material
Source: Springer Nature journal article supplement (https://www.springermedizin.de/resource/supplementary/12913_2013_3743_MOESM3_ESM.pdf/9532298)
Supplement: MOESM3 [file 9532298]

| Characteristics                                 | VHVs<br>(n = 149) | %    |
|-------------------------------------------------|-------------------|------|
| Sex                                             |                   |      |
| Male                                            | 133               | 89.3 |
| Female                                          | 16                | 10.7 |
| Age                                             |                   |      |
| < 29                                            | 47                | 31.5 |
| 30 ~ 44                                         | 59                | 30.6 |
| > 45                                            | 43                | 28.9 |
| Main job                                        |                   |      |
| Famer                                           | 143               | 96.0 |
| Merchant                                        | 3                 | 2.0  |
| Other                                           | 3                 | 2.0  |
| Education attainment                            |                   |      |
| No formal education                             | 5                 | 3.4  |
| Primary (1-5years)                              | 114               | 76.5 |
| Secondary or above                              | 30                | 20.1 |
| Possession of vehicles*                         |                   |      |
| Nothing                                         | 35                | 23.5 |
| Motor bike                                      | 108               | 72.5 |
| Car or tractor                                  | 48                | 32.2 |
| Distance between village and health center (Km) |                   |      |
| < 4                                             | 55                | 36.9 |
| 5 ~ 9                                           | 49                | 32.9 |
| > 10                                            | 45                | 30.2 |
| Work experience as VHV                          |                   |      |
| < 4                                             | 38                | 25.5 |
| 5 ~ 9                                           | 60                | 40.3 |
| > 10                                            | 51                | 34.2 |
| Number of training sessions attended            |                   |      |
| < 1                                             | 37                | 24.8 |
| 2 or 3                                          | 66                | 44.3 |
| > 4                                             | 46                | 30.9 |
